# Supplementary material
Source: ML conference proceedings conference paper supplement (https://openreview.net/forum?id=wS1fD0ofay)

Non-Rejected Test Acc.

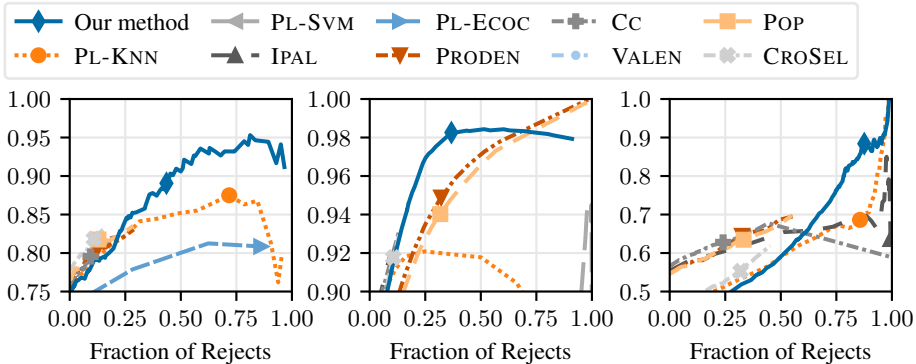

Supplement: supplementary_material [file attachment]
